# Supplementary material for: Trans-splicing of the C. elegans let-7 primary transcript developmentally regulates let-7 microRNA biogenesis and let-7 family microRNA activity
Source: Oxford University Press journal article supplement (doi:10.1242/dev.172031), 2019-02-15
Supplement: dev172031supp.pdf [file dev172031supp.pdf]

## SUPPLEMENTAL MATERIAL

Table S1. Summary of CRISPR/Cas9 alleles

| <u>Allele name</u>   | <u>crRNA(s)</u>                                                        | <u>Mutation</u>                                                                                                                                                                                                                                             |
|----------------------|------------------------------------------------------------------------|-------------------------------------------------------------------------------------------------------------------------------------------------------------------------------------------------------------------------------------------------------------|
| ma388                | 5' LCE crRNA<br>3' LCE crRNA                                           | X:14743758<ctgtcaccgcaaate[Δ55bp]ttggacctatTTTT>X:14743674                                                                                                                                                                                                  |
| ma403                | SA1 crRNA                                                              | X:14743856<atagtggaaatcatg[Δ14bp]aacctcatctgctgg>X:14743827                                                                                                                                                                                                 |
| ma406                | IVT 5' previously published crRNA<br>IVT 3' previously published crRNA | X:14743877<tgctagtcttcacca[Δ178bp]acctatTTTTtaa>X:14743680                                                                                                                                                                                                  |
| ma408*               | IVT mutLCE crRNA                                                       | X:14743741<caggatctcacact <b>TtGccAcaacacctGtaTTtGatccgcatTtaTTtG</b> attggacctatTTTT>X:14743676                                                                                                                                                            |
| ma422**,<br>ma423*** | IVT ma422 crRNA<br>IVT ma423 crRNA                                     | <b>ma422</b><br>X:14743981<cggtaatgtatctgg[Δ6bp]taatctaactgatgtactgtt[Δ2bp]gtaatgtatccatg[Δ2bp]gccgttgacatttct[Δ2bp]tggtaa gatgtgcaa>X:14743888<br><b>ma423</b><br>X:14743873<agtcttcaccattgt[Δ1bp]gatagtggaaatcatgtttatttc[Δ1bp]ggggaacctcatctg>X:14743817 |
| ma485 ****           | 5' LCE crRNA<br>3' LCE crRNA                                           | X:14743758<ctgtcaccgcaaate[Δ55bp]ttggacctatTTTT>X:14743674                                                                                                                                                                                                  |

\*made by replacing 55bp deletion of ma388 with mutated LCE; nucleotide changes are capitalized and in bold.

\*\*ma422 was made using IVT ma422 crRNA in the background of ma409 (not used for experiments in this article) which has a 113bp deletion of SA1-2.

\*\*\*ma423 was made using IVT ma423 crRNA in the background of ma422 by replacing the 113 bp deletion (ma409) with mutated SA1-2.

\*\*\*\*ma485 was made in a *let-7(mg279)* background and is the same deletion as ma388

**Table S2. Oligonucleotides used in this study**

| <b>Oligo ID</b> | <b>Name</b>     | <b>Sequence</b>                                                                                                       |
|-----------------|-----------------|-----------------------------------------------------------------------------------------------------------------------|
| oCN66           | let-7 RT        | ATCTAATTATCAAGAGCAAGTTCAAATGT                                                                                         |
| oCN59           | SL1 F           | GGTTTAATTACCCAAGTTTGAG                                                                                                |
| oCN61           | LCE R           | GAGGTGTTGAGGTAGAAGTGTGAG                                                                                              |
| oCN342          | LCE probe       | GGATGAGGTAGAGGTGTTGAGGTAGGGCGGG                                                                                       |
| oCN343          | SL1-LCE probe   | TTCCCCTCAAACCTTGGGTAATTAAACCGGCGGG                                                                                    |
| oCN345          | let-7 probe     | AACTATAACAACCTACTACCTCAGGCGGG                                                                                         |
| oCN347          | 5.8s rRNA probe | GAACCAGACGTACCAACTGGAGGCCCGGCGGG                                                                                      |
|                 | oligo (dT) 20   | TTTTTTTTTTTTTTTTTTTTTTTT                                                                                              |
| oCN70           | SL1-pri-let-7 F | GGTTTAATTACCCAAGTTTGAGGCAAG                                                                                           |
| oCN71           | SL1-LCE F       | GGTTTAATTACCCAAGTTTGAGGGGAA                                                                                           |
| oCN356          | TSO 5' RACE     | G TTCAGAGTTCTACAGTCCGACGATCrGrGrG                                                                                     |
| oCN357          | Rd1 SP          | G TTCAGAGTTCTACAGTCCGACGATC                                                                                           |
| oCN216          | pri-let-7 F     | CAAGCAGGCGATTGGTG                                                                                                     |
| oCN63           | pri-let-7 R     | CGAAGAGTTCTGTCTCCGGTAAGG                                                                                              |
| oCN339          | T7 SL1-LCE F    | TAATACGACTCACTATAGGGGTTTAATTACCCAA<br>GTTTGAGGGGAACCTCATCTGCTGGG                                                      |
| oCN337          | T7 pri-let-7 F  | TAATACGACTCACTATAGGATTCTAGATGAGTA<br>GCCACCTAGCAG                                                                     |
|                 | tracrRNA        | IDT Alt-R™ CRISPR tracrRNA                                                                                            |
|                 | dpy-10 crRNA    | IDT Alt-R™ CRISPR crRNA<br>/A1TR1/rGrCrUrArCrCrArUrArGrGrCrArCrCrArCrGrA<br>rGrGrUrUrUrUrArGrArGrCrUrArUrGrCrU/A1TR2/ |
| oCN181          | 5' LCE crRNA    | IDT Alt-R™ CRISPR crRNA<br>/A1TR1/rGrGrCrUrGrUrCrArCrCrGrCrArArArUrCrArU<br>rCrGrUrUrUrUrArGrArGrCrUrArUrGrCrU/A1TR2/ |
| oCN182          | 3' LCE crRNA    | IDT Alt-R™ CRISPR crRNA<br>/A1TR1/rArArArArArArArUrArGrGrUrCrCrArArUr<br>CrGrGrUrUrUrUrArGrArGrCrUrArUrGrCrU/A1TR2/   |

|        |                                      |                                                                                                                                                |
|--------|--------------------------------------|------------------------------------------------------------------------------------------------------------------------------------------------|
| oCN87  | $\Delta$ LCE HR                      | GCCGTCTGGCACCAAGTGGGCTGTCACCGCAA<br>TCTTGACCTATTTTTTTTAAATTCTTCAAATAA<br>AAAC                                                                  |
| oCN180 | SA1 crRNA                            | IDT Alt-R™ CRISPR crRNA<br>/A1TR1/rGrArArArUrCrArUrGrUrUrUrArUrUrUrCr<br>ArGrGrUrUrUrUrArGrArGrCrUrArUrGrCrU/A1TR2/                            |
| oCN77  | $\Delta$ SA1 HR                      | GCTAGTCTTCACCATTGTAGATAGTGGAAATCAT<br>GAACCTCATCTGCTGGGCAACTACTCCAACATG<br>CGTG                                                                |
| oCN183 | T7 promoter                          | TAATACGACTCACTATAG                                                                                                                             |
| oCN184 | IVT dpy-10 crRNA                     | CAAAACAGCATAGCTCTAAAACCTCGTGGTGCC<br>TATGGTAGCCTATAGTGAGTCGTATTA                                                                               |
| oCN198 | IVT 5' previously<br>published crRNA | CAAAACAGCATAGCTCTAAAACCTATCTACAAT<br>GGTGAAGACCTATAGTGAGTCGTATTA                                                                               |
| oCN199 | IVT 3' previously<br>published crRNA | CAAAACAGCATAGCTCTAAAACCGATTGGACCT<br>ATTTTTTTCCTATAGTGAGTCGTATTA                                                                               |
| oCN201 | Previously published<br>HR           | TGCAATAGTTCCAATTGCTAGTCTTCACCAACCT<br>ATTTTTTTTAAATTCTTCAAATAAAA                                                                               |
| oCN210 | IVT mutLCE crRNA                     | CAAAACAGCATAGCTCTAAAACAGATTTGCGGT<br>GACAGCCCTATAGTGAGTCGTATTA                                                                                 |
| oCN209 | IVT mutLCE HR                        | GCCGTCTGGCACCAAGTGGGCTGTCACCGCAA<br>TCATCAGGATCTCACACTTTTGCCACAACACCTG<br>TATTTGATCCGCATTTATTTGGATTGGACCTATT<br>TTTTTTAAATTCTTCAAATAAAAA       |
| oCN239 | IVT ma422 crRNA                      | CAAAACAGCATAGCTCTAAAACGATACATTACC<br>GATACAACCCTATAGTGAGTCGTATTA                                                                               |
| oCN248 | mutSA3-6 HR                          | GAAGTGTATTCGGAGAACTGTTGTATCGGTAAT<br>GTATCTGGAATAATCTAATCGTATGTACTGTTGT<br>AATGTATCCATGGCCGTTTGACATTTCTTGGTAA<br>GATGTGCAATAGTTCCAATTGCTAGTCTT |

|        |                   |                                                                                                                                                                                                               |
|--------|-------------------|---------------------------------------------------------------------------------------------------------------------------------------------------------------------------------------------------------------|
| oCN266 | IVT ma423 crRNA   | CAAAACAGCATAGCTCTAAAACCAAATCATCAG<br>GATCTCACCTATAGTGAGTCGTATTA                                                                                                                                               |
| oCN265 | mutSA1-2 HR       | GAGGTGTTGAGGTAGAAGTGTGAGATCCTGATG<br>ATTTGCGGTGACAGCCCACTTGGTGCCAGACGG<br>CATTCCCTAGGCGACACGCATGTTGGAGTAGTT<br>GCCCAGCAGATGAGGTTCCCCGAAAATAAACAT<br>GATTTCCACTATCACAATGGTGAAGACTAGCAA<br>TTGGA ACTATTGCACATCT |
| oCN397 | mir-241 synthetic | rUrGrArGrGrUrArGrGrUrGrCrGrArGrArArUrGrA                                                                                                                                                                      |
|        | gpd-1 QPCR F      | GATGGACCAATGAAGGGAAT                                                                                                                                                                                          |
|        | gpd-1 QPCR R      | GTCGTACCAAGAGACGAGCTT                                                                                                                                                                                         |
|        | let-7 synthetic   | rUrGrArGrGrUrArGrUrArGrGrUrUrGrUrArUrArGrUr<br>U                                                                                                                                                              |
|        | mir-48 synthetic  | rUrGrArGrGrUrArGrGrCrUrCrArGrUrArGrArUrGrCrG<br>rA                                                                                                                                                            |
|        | mir-84 synthetic  | rUrGrArGrGrUrArGrUrArUrGrUrArArUrArUrUrGrUr<br>ArGrA                                                                                                                                                          |

Table S3. *C. elegans* strains used in this study

| <u>Strain Name</u> | <u>Strain Description</u>     | <u>Genotype</u>                                                |
|--------------------|-------------------------------|----------------------------------------------------------------|
| MT355              | <i>lin-14(gf)</i>             | <i>lin-14(n355)</i> X                                          |
| VT965              | <i>lin-14(lf)</i>             | <i>lin-14(n179)</i> X                                          |
| VT1295             | <i>lin-28(0)/lin-28</i> null  | <i>lin-28(n719)</i> I; <i>maIs105</i> V                        |
| VT1367             | wild type/WT                  | <i>maIs105</i> [ <i>col-19::gfp</i> ] V                        |
| VT3594             | <i>lin-28(0); lin-46(0)</i>   | <i>lin-28(n719)</i> I; <i>lin-46(ma164)</i> , <i>maIs105</i> V |
| VT3609             | <i>lin-4(lf)</i>              | <i>lin-4(e912)</i> II; <i>maIs105</i> V                        |
| VT3616             | $\Delta$ LCE                  | <i>let-7(ma388)</i> X; <i>maIs105</i> V                        |
| VT3666             | $\Delta$ SA1                  | <i>let-7(ma403)</i> X; <i>maIs105</i> V                        |
| VT3669             | previously published deletion | <i>let-7(ma406)</i> X; <i>maIs105</i> V                        |

|        |                                                  |                                                                                                                                                                                            |
|--------|--------------------------------------------------|--------------------------------------------------------------------------------------------------------------------------------------------------------------------------------------------|
| VT3675 | $\Delta$ SA1; <i>lin-28(0)</i>                   | <i>let-7(ma403)</i> X; <i>lin-28(n719)</i> I; <i>maIs105</i> V                                                                                                                             |
| VT3678 | mutLCE                                           | <i>let-7(ma408)</i> X; <i>maIs105</i> V                                                                                                                                                    |
| VT3718 | mutSA1-6                                         | <i>let-7(ma422ma423)</i> X; <i>maIs105</i> V                                                                                                                                               |
| VT3719 | mutLCE; <i>mir-48(0)</i>                         | <i>let-7(ma408)</i> X; <i>miR-48(n4097)</i> , <i>maIs105</i> V                                                                                                                             |
| VT3720 | $\Delta$ LCE; <i>mir-48(0)</i>                   | <i>let-7(ma388)</i> X; <i>miR-48(n4097)</i> , <i>maIs105</i> V                                                                                                                             |
| VT3721 | $\Delta$ LCE; <i>mir-48(0)</i> <i>mir-241(0)</i> | <i>let-7(ma388)</i> X; <i>miR-48</i> <i>miR-241(nDF51)</i> , <i>maIs105</i> V                                                                                                              |
| VT3837 | <i>mir-48(0)</i>                                 | <i>mir-48(n4097)</i> , <i>maIs105</i> V                                                                                                                                                    |
| VT3838 | mutSA1-6; <i>mir-48(0)</i>                       | <i>let-7(ma422ma423)</i> X; <i>mir-48(n4097)</i> , <i>maIs105</i> V                                                                                                                        |
| VT3839 | <i>let-7</i> locus' ORF::GFP transgene           | <i>maEx264</i> [ <i>unc-119+</i> ; <i>plet-7::let-7</i> locus with ORF::GFP]; <i>unc-119(ed3)</i> III                                                                                      |
| VT3840 | <i>mir-48(0)</i> <i>mir-241(0)</i>               | <i>mir-48</i> <i>mir-241</i> ( <i>nDf51</i> ), <i>maIs105</i> V                                                                                                                            |
| VT3902 | <i>let-7(mg279<math>\Delta</math>LCE)</i>        | <i>let-7(mg279ma485)</i> X; <i>maIs105</i> V                                                                                                                                               |
| VT3903 | LCE transgene; $\Delta$ LCE; <i>mir-48(0)</i>    | <i>maEx267</i> [ <i>rol-6(su1006)</i> ; <i>unc-119+</i> , <i>plet-7::let-7</i> locus without mature <i>let-7</i> sequence]; <i>let-7(ma388)</i> X; <i>mir-48(n4097)</i> , <i>maIs105</i> V |

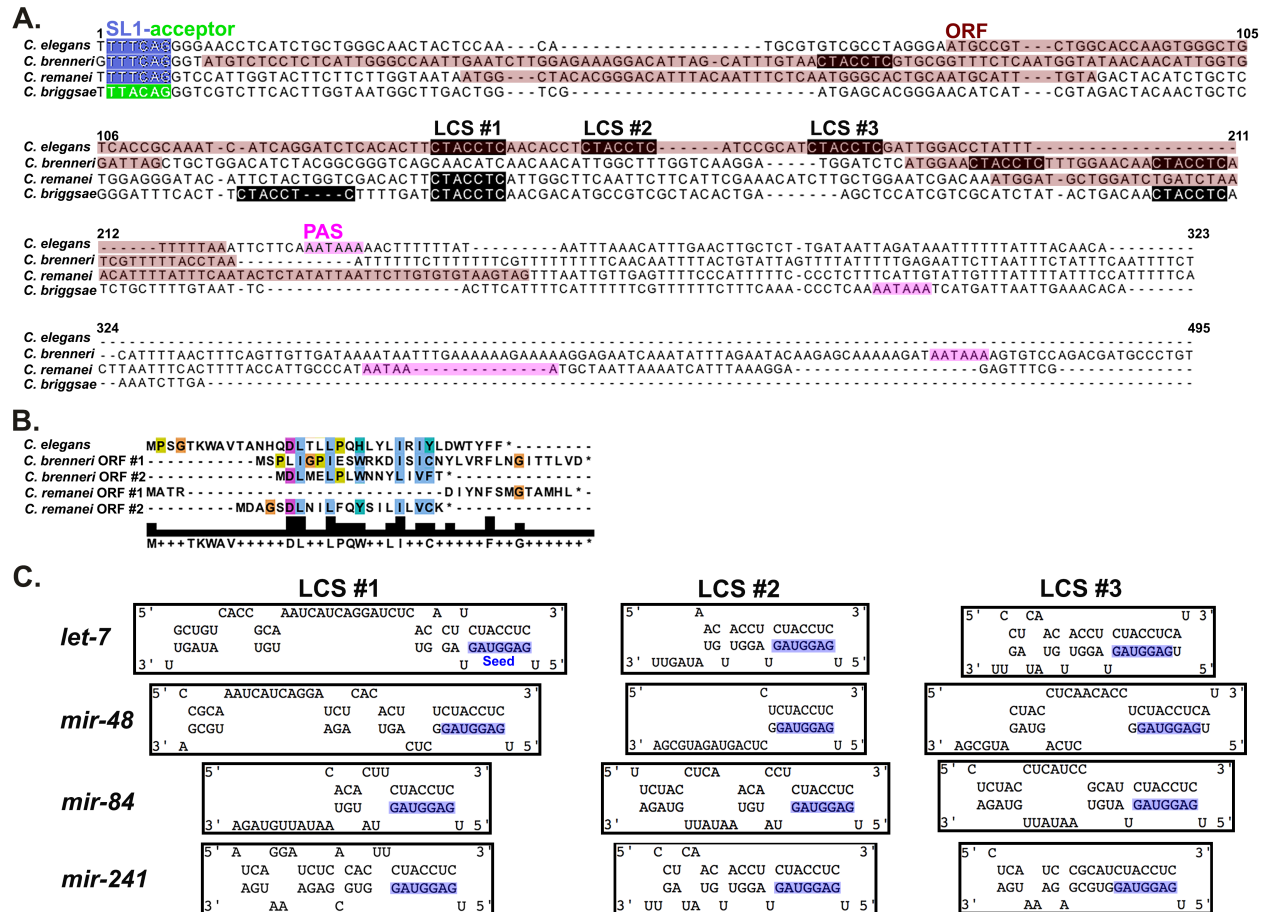

**Figure S1. The LCE and SL1 splice acceptor sequences are conserved among *Caenorhabditis* species.**

- (A) Genomic alignment of the regions downstream (3') from the *pre-let-7* stem-loop of four *Caenorhabditis* species' *let-7* loci. Highlighted in blue is the canonical SL1-acceptor sequence. Highlighted in green is a non-canonical SL1-acceptor sequence. Red shading marks potential open reading frames (ORF). Black shading indicates is *let-7* complementary sequence (LCS). Predicted polyadenylation signals (PAS) are shaded in pink.
- (B) Amino acid alignment of the potential ORFs of the *SL1-LCEs*.
- (C) Predicted RNA hybridization of *let-7fam* microRNAs (bottom strands; 5' to the right) with the three LCSs in *C. elegans* *SL1-LCE*. Highlighted in light blue is the seed sequence of each microRNA.

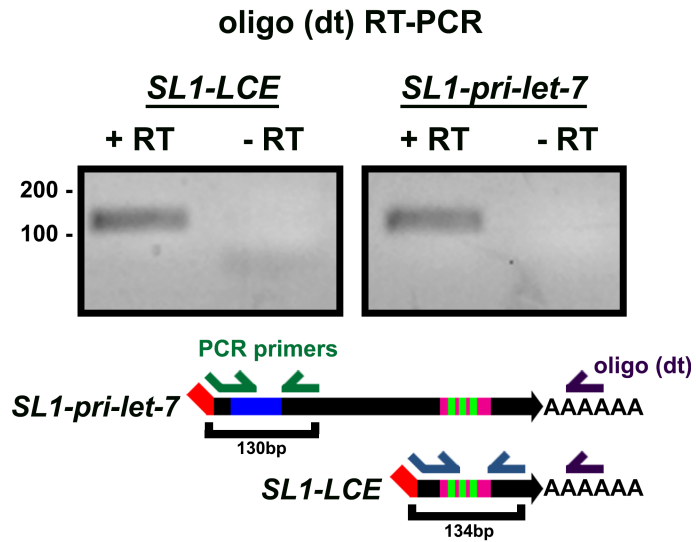

**Figure S2. *let-7* locus transcripts are polyadenylated.**

Non-quantitative RT-PCR of cDNA made from total RNA from a mixed-population of WT animals with (+) or without (-) RT in the cDNA synthesis step. The left panel shows products of a PCR reaction using primers (green in the diagram) specific for *SL1-pri-let-7*; the right panel shows products of a PCR reaction using primers (turquoise in the diagram) specific for *SL1-LCE*. Numbers mark dsDNA ladder bands in bp.

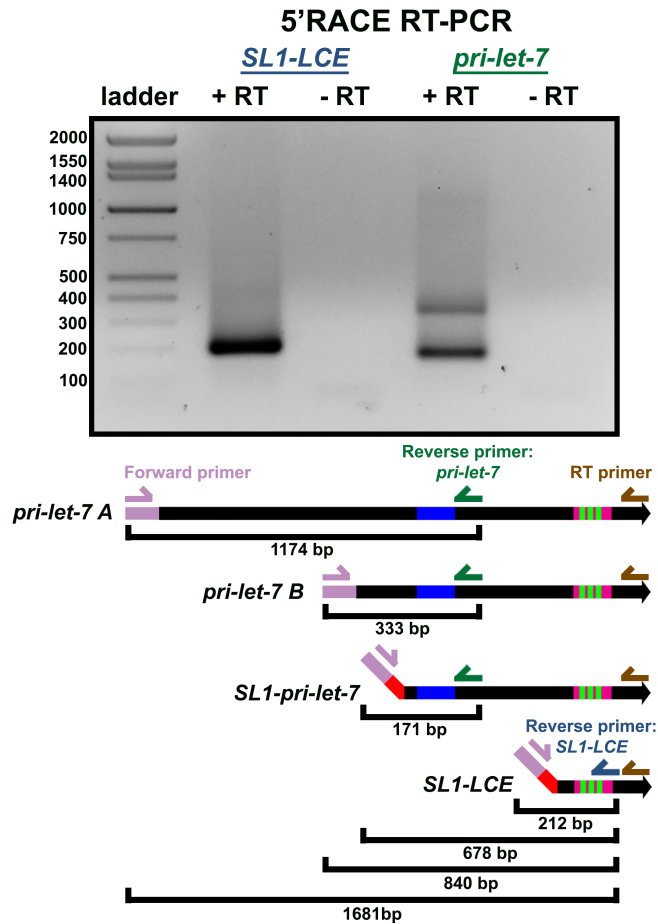

**Figure S3. The *SL1-LCE* is the only detectable transcript from the *let-7* locus that does not contain *pri-let-7*.**

Non-quantitative 5'RACE RT-PCR of cDNA made from total RNA from molting L2 WT animals (24 hours after plating) with (+) or without (-) RT in the cDNA synthesis step. The left two lanes show products of PCR reactions using a primer pair (turquoise and pink) that is expected to amplify all LCE containing *let-7* transcripts. Note: *SL1-LCE* is preferentially amplified because of the short product produced from *SL1-LCE* compared to the products produced from *pri-let-7* isoforms. The right two lanes show products of PCR reactions using a primer pair (green and pink) that is expected to amplify *pri-let-7* isoforms only. Note: two *pri-let-7* isoforms (*B* and *SL1*) are preferentially amplified due to their shorter product sizes. Numbers mark dsDNA ladder bands in bp.



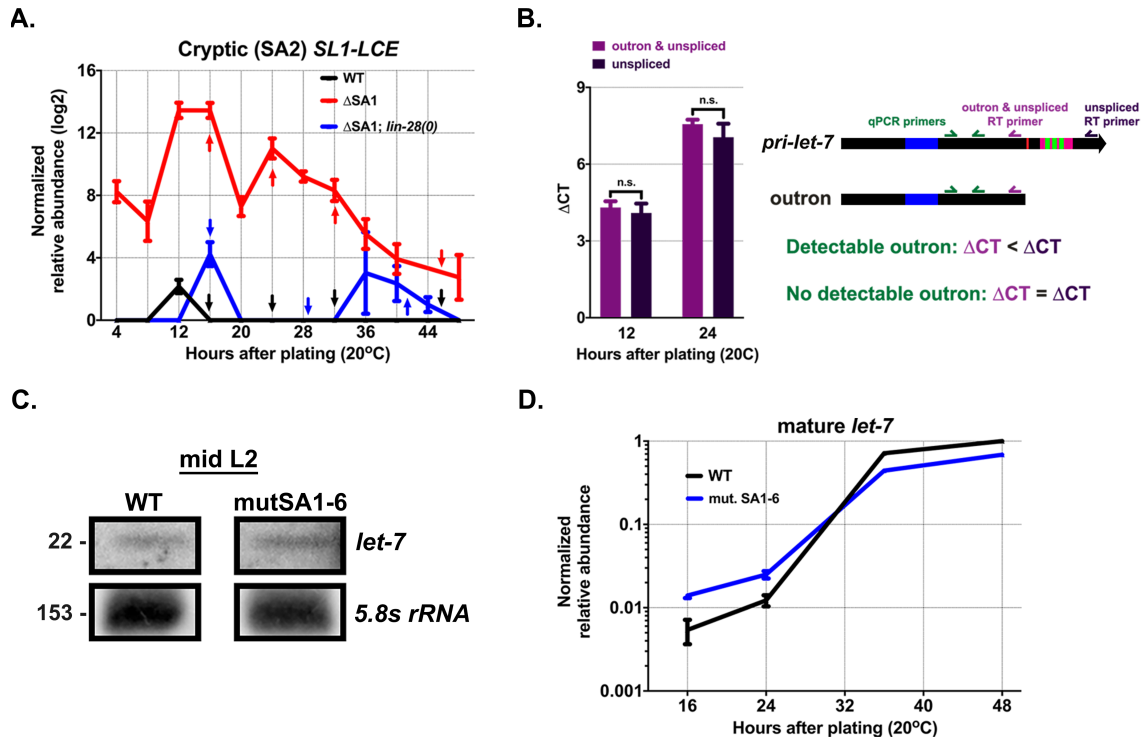

**Figure S4. Deletion of the canonical splice acceptor results in the use of non-canonical splice acceptors, the *pri-let-7* outtron is not detectable in L1 and L2 larvae, and mutations that reduce LCE trans-splicing display elevated levels of mature *let-7* in the L1 and L2 stages and reduced levels in the L3 and L4 stages, compared to WT.**

(A) qRT-PCR developmental profile of the levels of an *SL1-LCE* transcript

(*Cryptic(SA2)SL1-LCE*) that contains SL1 spliced to a cryptic SA sequence (TTGTAG). *Cryptic(SA2)SL1-LCE* levels were determined for samples from wild type (black), ΔSA1 (red), and doubly-mutant ΔSA1; *lin-28(0)* (blue) animals throughout development. Data are represented as mean ±SD. n's = 3 biological replicates. Arrows mark the times of larval molts.

(B) qRT-PCR analysis of cDNA synthesized from WT mid-L1 (12 hours after plating) and molting-L2 (24 hours after plating) either upstream (outtron & unspliced RT primer) or downstream (unspliced RT primer) of the canonical splice acceptor. Data are represented as mean ±SD. n = 3's biological replicates. Statistical significance was determined using a two-tailed Student's t test.

(C) Total RNA from mid-L2 (20 hours after plating) WT and mutSA1-6 animals analyzed by northern blotting with a probe for *let-7* mature microRNA. Numbers mark RNA sizes in nt.

(D) FirePlex miRNA analysis of *let-7* levels in WT and mutSA1-6 animals throughout development. Data are represented as mean  $\pm$ SD. n = 3.

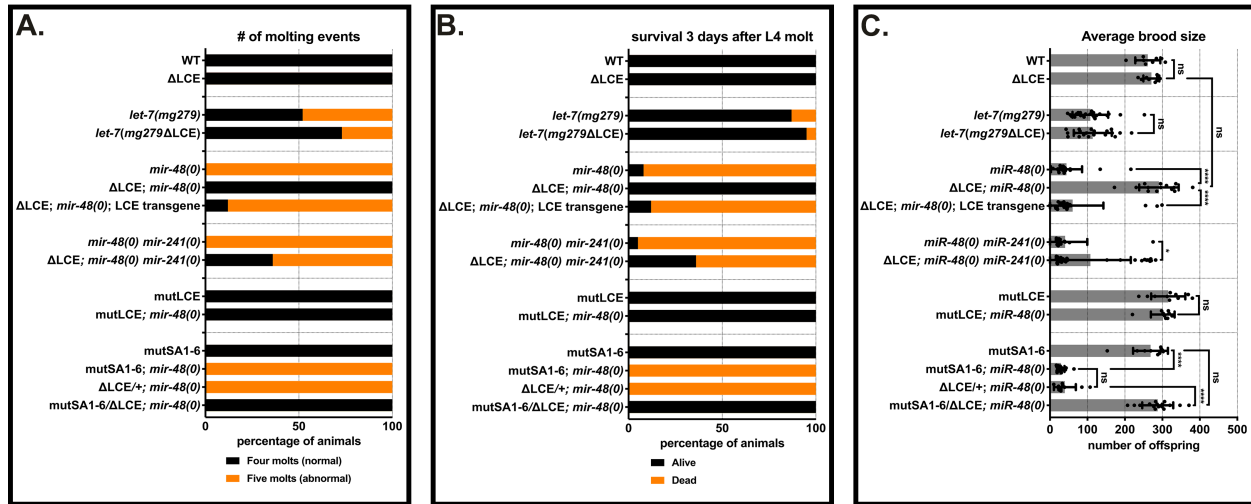

**Figure S5. Inhibition of *SL1-LCE* function, either by deletion of the LCE, or by mutations of LCE-proximal trans-splicing acceptor sequences, suppresses multiple phenotypes associated with the retarded development of *mir-48(0)* animals.**

Deletion ( $\Delta$ LCE) or mutation (mutLCE) of the LCE or mutation in the SAs (mutSA1-6) suppresses (A) the extra molt, n's from top (WT) to bottom (mutSA1-6/ $\Delta$ LCE; *mir-48(0)*): 9, 10, 23, 12, 9, 22, 26, 18, 15, 10, 15, 10, 10, 11, and 16, (B) adult lethality, n's from top (WT) to bottom (mutSA1-6/ $\Delta$ LCE; *mir-48(0)*): 9, 10, 23, 12, 9, 22, 26, 18, 15, 10, 15, 10, 10, 11, and 16, and (C) reduced brood size of *mir-48(0)* animals, n's from top (WT) to bottom (mutSA1-6/ $\Delta$ LCE; *mir-48(0)*): 9, 9, 23, 20, 26, 14, 26, 18, 33, 9, 29, 10, 29, 11, and 16 animals. The graphs are quantifications of each respective phenotype observed for each genotype. Statistical significance was determined using a two-tailed Student's t test. P-values: ns > 0.05, \* =  $\leq$  0.05, \*\*\*\*  $\leq$  0.0001.

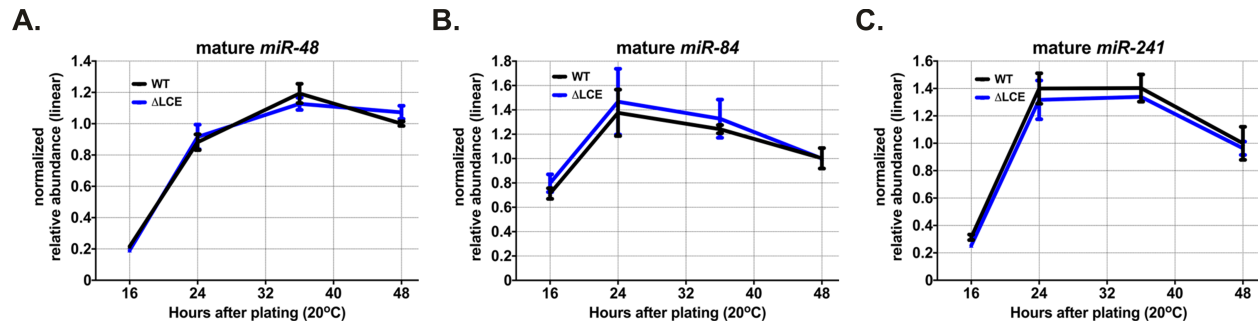

**Figure S6. Deletion of LCE sequences from the *let-7* locus does not detectably change the levels of *let-7fam* microRNAs.**

FirePlex miRNA analysis of (A) *mir-48*, (B) *mir-84*, and (C) *mir-241* levels in WT and LCE deletion animals throughout development. Data are represented as mean  $\pm$ SD. n's = 3 biological replicates.

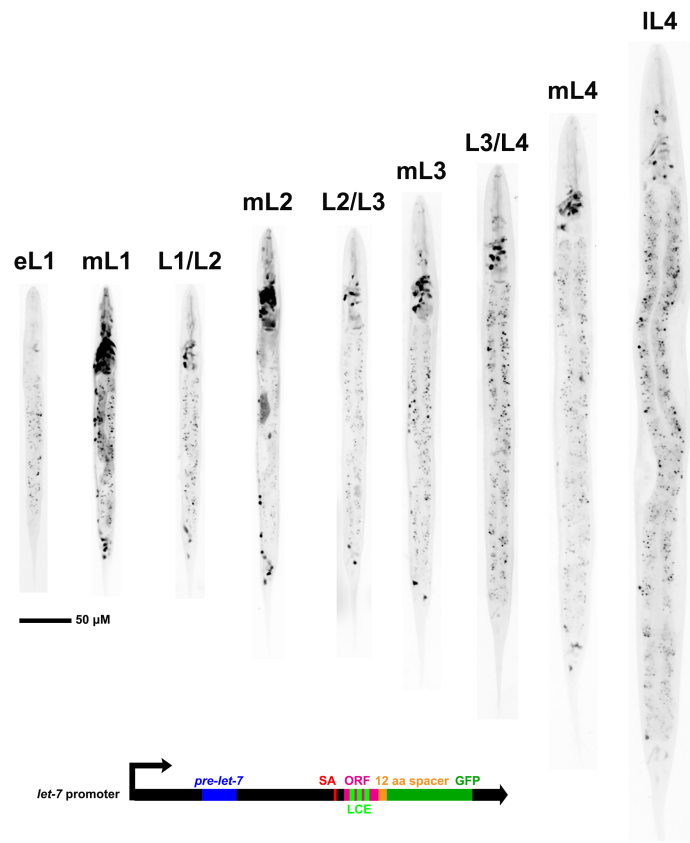

**Figure S7. Temporal profile of expression of a GFP-tagged LCE ORF recapitulates that observed for *SL1-LCE*.**

Express of GFP in animals carrying an *let-7* locus LCE ORF::GFP transgene throughout development. Images are of representative animals. Note: puncta observed in the intestine is from autofluorescence.
